# Supplementary material
Source: Elsevier journal article supplement (https://www.sciencedirect.com/science/article/pii/S2253654X21001992)
Supplement: mmc2 [file S2253654X21001992:mmc2.docx]

*ANEXO RESULTADOS*

|  | n | % | Medidas centralización | Otros |
| --- | --- | --- | --- | --- |
| **Señale el tipo de cirugía radioguiada que se realiza en su hospital para la localización de lesiones no palpables de mama** | 55 | 100% |  |  |
| - Arpón, ya que no se utiliza técnica radioguiada para la localización de tumores no palpables (con/sin BSGC). | 21 | 38,2% |  |  |
| - SNOLL/ROLL | 7 | 12,7% |  |  |
| - Semilla 125I (con/sin BSGC) y/o semillas 125I para marcar ganglios axilares | 1 | 1,8% |  |  |
| - A o B según indicación. | 18 | 32,7% |  |  |
| - A o C según indicación. |  | 0 |  |  |
| - B o C según indicación. | 3 | 5,5% |  |  |
| - A, B o C según indicación | 5 | 9,1% |  |  |
|  |  |  |  |  |
| **1. Uso de la técnica SNOLL/ROLL** |  |  |  |  |
| **1.1. Utiliza la técnica SNOLL/ROLL desde hace:** | 33 | 100% |  |  |
| - <1 año. |  |  |  |  |
| - 1-3 años. | 2 | 6,1% |  |  |
| - 3-5 años. | 1 | 3,0% |  |  |
| - 5-10 años. | 9 | 27,3% |  |  |
| - >10 años. | 20 | 60,6% |  |  |
| - NS/NC. | 1 | 3,0% |  |  |
| **1.2. El número aproximado de casos al año que realiza en su centro es:** |  |  |  |  |
| **1.2.1. SNOLL** | 33 | 100% |  |  |
| - <10 casos/año | 9 | 27,3% |  |  |
| - 10-50 casos/año | 9 | 27,3% |  |  |
| - 50-100 casos/año | 5 | 15,2% |  |  |
| - 100-200 casos/año | 4 | 12,1% |  |  |
| - >200 casos/año | 6 | 18,18% |  |  |
| - NS/NC. |  |  |  |  |
| **1.2.2. ROLL** | 33 | 100% |  |  |
| - <10 casos/año | 18 | 54,5% |  |  |
| - 10-50 casos/año | 9 | 27,3% |  |  |
| - 50-100 casos/año | 4 | 12,1% |  |  |
| - 100-200 casos/año | 1 | 3% |  |  |
| - >200 casos/año | 1 | 3% |  |  |
| - NS/NC. |  |  |  |  |
| **1.3. El porcentaje aproximado de cirugía radioguiada con la técnica SNOLL/ROLL, respecto al total de su actividad en cirugía radioguiada de mama es:** | 33 | 100% |  |  |
| - < 10%. | 13 | 39,4% |  |  |
| - Entre 10% y 30%. | 7 | 21,2% |  |  |
| - Entre 30% y 60%. | 5 | 15,2% |  |  |
| - Entre 60% y 80%. | 5 | 15,2% |  |  |
| - Más del 80%. | 3 | 9,1% |  |  |
| - NS/NC. |  |  |  |  |
|  |  |  |  |  |
| **2. Para la implantación de la técnica ROLL/SNOLL en su centro:** | 33 | 100% |  |  |
| - Ha realizado algún tipo de validación | 7 | 21,2% |  |  |
| - Ha asistido a algún curso/taller específico | 7 | 21,2% |  |  |
| - Ambas cosas | 10 | 30,3% |  |  |
| - Ninguna de las anteriores | 9 | 27,3% |  |  |
| - NS/NC |  |  |  |  |
|  |  |  |  |  |
| **3. Indicación de la técnica ROLL/SNOLL, lesiones no palpables...** | 33 | 100% |  |  |
| - Benignas/AP equívocas o border line. |  |  |  |  |
| - Malignas con/sin indicación de BSGC | 3 | 9,1% |  |  |
| - En el contexto de QTN con/sin indicación de BSGC | 2 | 6,1% |  |  |
| - A y B | 3 | 9,1% |  |  |
| - B y C | 10 | 30,3% |  |  |
| - Todas las anteriores | 15 | 45,5% |  |  |
| - Otras (indicar). |  |  |  |  |
|  |  |  |  |  |
| **4. Tipo de lesión radiológica (multiopción):** | 33 | 100% |  |  |
| - Nódulo ecovisible | 31 | 93,9% |  |  |
| - Microcalcificaciones | 18 | 54,4% |  |  |
| - DAF (densidad focal asimétrica) | 12 | 36,3% |  |  |
| - Lesiones menores de…(indicar dimensión en comentarios) | 1 | 3,1% |  | <1mm |
| - Otras (indicar). | 2 | 6,1% |  | Clip meta, adenopatias, respuesta postQTN |
|  |  |  |  |  |
| **5. Radiotrazador y protocolo utilizados…** |  |  |  |  |
| **5.1 Número de Dosis:** | 33 | 100% |  |  |
| - Siempre una sola dosis (ROLL/SNOLL) | 23 | 69,7% |  |  |
| - Dosis separadas para GC si SNOLL | 6 | 18,2% |  |  |
| - Otros (indicar) | 3 | 9,1% |  |  |
| - NS/NC. | 1 | 3,0% |  |  |
| **5.2. En caso de SNOLL con dosis separadas, ¿Dónde inyecta la dosis para GC?** | 13 | 100% |  |  |
| - Intratumoral/ Peritumoral | 3 | 23,1% |  |  |
| - Periareolar | 7 | 53,8% |  |  |
| - Subdérmica | 3 | 23,1% |  |  |
| - NS/NC, o usamos una sola dosis. |  |  |  |  |
| **5.3. Moléculas utilizadas (recuerde señalar solo una opción, la que más frecuentemente utilice en su hospital):** |  |  |  |  |
| **SNOLL** | 33 | 100% |  |  |
| - Nanocoloides | 21 | 63,6% |  |  |
| - MAA+Nanocoloides | 8 | 24,2% |  |  |
| - Semilla 125I +Nanocoloides | 4 | 12,1% |  |  |
| - Tilmanocept |  |  |  |  |
| - MAA+Tilmanocept |  |  |  |  |
| - Semilla 125I+Tilmanocept |  |  |  |  |
| - Otros (especificar en comentarios) |  |  |  |  |
| **ROLL** | 32 | 100% |  |  |
| - MAA | 24 | 75,0% |  |  |
| - Nanocoloides | 4 | 12,5% |  |  |
| - Semilla 125I | 4 | 12,5% |  |  |
| - Otros (especificar en comentarios) |  |  |  |  |
| **5.4. Dosis habitual (indicar mCi)** |  |  |  |  |
| SNOLL: …MBq | 29 |  | Moda=111 (37-185) Media=112,11 |  |
| ROLL: …MBq | 28 |  | Moda=74 (3,7-185) Media=78,44 |  |
| **5.5. Volumen habitual** |  |  |  |  |
| - Distinto volumen para SNOLL y ROLL (indicar en ml): |  |  |  |  |
| -ROLL: …ml | 28 |  | Moda 0,2 (0,1-5) Media 1 |  |
| -SNOLL: …ml | 31 |  | Moda 0,2 (0,1-4) Media 0,9 |  |
| - Otro (indicar en comentario) |  |  |  |  |
| **5.6. En protocolo que más frecuentemente se utiliza en su centro es...** |  |  |  |  |
| **5.6.1 SNOLL:** | 33 | 100% |  |  |
| - 1 días | 8 | 24,2% |  |  |
| - 2 días | 21 | 63,6% |  |  |
| - Ambos indistintamente | 4 | 12,1% |  |  |
| - otro |  |  |  |  |
| **5.6. 2 ROLL** | 33 | 100% |  |  |
| - 1 días | 11 | 33.3% |  |  |
| - 2 días | 19 | 57,6% |  |  |
| - Ambos indistintamente | 3 | 9,1% |  |  |
| - otro |  |  |  |  |
|  |  |  |  |  |
| **6. Método de inyección del trazador…** | 33 | 100% |  |  |
| - Únicamente ecografía | 16 | 48,5% |  |  |
| - Únicamente estereotaxia |  |  |  |  |
| - Ecografía vs. estereotaxia según caso | 15 | 45.5% |  |  |
| - Otros (comentar). | 2 | 6,1% |  | ECO, estereotaxia, TAC y/o RM |
|  |  |  |  |  |
| **7. Control radiológico de la inyección:** | 33 | 100% |  |  |
| - No se utiliza. | 14 | 42,4% |  |  |
| - Pequeño volumen de aire. | 13 | 39,4% |  |  |
| - Pequeño volumen de suero. | 2 | 6,1% |  |  |
| - Contraste radiológico (estereoataxia). | 2 | 6,1% |  |  |
| - Otro (indicar). | 2 | 6,1% |  | MAMOGRAFIA, SPECT/CT, mismo radiólogo por cambios de densidad |
|  |  |  |  |  |
| **8. Realización de imágenes** |  |  |  |  |
| **8.1. Tiempo trascurrido entre la inyección y la toma de imagen (indicar en minutos):** |  |  |  |  |
| - SNOLL: …minutos | 32 |  | Moda=120 (1-1080) Media=111 |  |
| - ROLL: …minutos | 31 |  | Moda=30 (0-1080) Media=78,1 |  |
| **8.2. Tipo de imagen:** | 33 | 100% |  |  |
| - Únicamente gammagrafía planar | 6 | 18,2% |  |  |
| - Gammagrafía planar y SPECT-TC siempre | 5 | 15,2% |  |  |
| - Gammagrafía planar y SPECT-TC según consideración | 21 | 63,6% |  |  |
| - Otras: | 1 | 3% |  | Gammagrafia planar y SPECT-Portatil, SPECT-CT según caso |
|  |  |  |  |  |
| **9. Complicaciones** |  |  |  |  |
| **9.1. Complicaciones respecto al tumor (ROLL/SNOLL)** | 33 | 100% |  |  |
| - NO | 22 | 66,7% |  |  |
| - Esporádicamente | 11 | 33,3% |  |  |
| - Frecuentemente |  |  |  |  |
| - NS/NC. |  |  |  |  |
| **9.2. Complicaciones respecto al GC (SNOLL).** |  |  |  |  |
| **9.2.1. Ausencia de migración del trazador al GC en imagen gammagráfica:** | 33 | 100% |  |  |
| - <5% | 12 | 36,4% |  |  |
| - 5-15% | 13 | 39,4% |  |  |
| - 15-25% | 6 | 18,2% |  |  |
| - >25% | 2 | 6,1% |  |  |
| **9.2.1. En caso de no migración, ¿realiza reinyecciones?:** | 33 | 100% |  |  |
| - NO | 3 | 9,1% |  |  |
| - Si | 30 | 90.9% |  |  |
| - NS/NC. |  |  |  |  |
|  |  |  |  |  |
| **10.Cirugía** |  |  |  |  |
| **10.1 Respecto al tumor (ROLL/SNOLL)** |  |  |  |  |
| **10.1.1 Tasa de detección tumoral.** | 32 | 100% |  |  |
| - < 85 %. |  |  |  |  |
| - 85 - 90 %. |  |  |  |  |
| - 90 - 95 %. | 2 | 6,3% |  |  |
| - 95 %. | 30 | 93,8% |  |  |
| - NS/NC. |  |  |  |  |
|  |  |  |  |  |
| **10.1.2 Tasa de márgenes afectos o insuficientes** | 32 | 100% |  |  |
| - < 10%. | 18 | 56,3% |  |  |
| - 10 - 20 %. | 5 | 15,6% |  |  |
| - 20 - 30 %. | 2 | 6,3% |  |  |
| - 30 - 40 %. |  |  |  |  |
| - 40 %. | 2 | 6,3% |  |  |
| - NS/NC. | 5 | 15,6% |  |  |
|  |  |  |  |  |
| **10.1.3 Tasa de ampliaciones intra-operatorias por borde insuficiente o afecto** | 32 | 100% |  |  |
| - < 20%. | 22 | 68,8% |  |  |
| - 20-40 %. | 2 | 6,3% |  |  |
| - 40-60 %. | 2 | 6,3% |  |  |
| - 60-80 %. | 1 | 3,1% |  |  |
| - 80%. |  |  |  |  |
| - NS/NC. | 5 | 15,6% |  |  |
|  |  |  |  |  |
| **10.1.4 Tasa de ampliaciones intra-operatorias empíricas***  ***(no justificadas por borde afecto o insuficiente)*** | 32 | 100% |  |  |
| - < 20% | 16 | 50,0% |  |  |
| - 20-40 % | 3 | 9,4% |  |  |
| - 40-60 % |  |  |  |  |
| - 60-80 % | 1 | 3,1% |  |  |
| - 80% |  |  |  |  |
| - NS/NC. | 12 | 37,5% |  |  |
|  |  |  |  |  |
| **10.1.5 Tasa de reintervenciones.** | 32 | 100% |  |  |
| - < 20% | 22 | 68,8% |  |  |
| - 20-40 % |  |  |  |  |
| - 40-60 % |  |  |  |  |
| - 60-80 % |  |  |  |  |
| - 80% |  |  |  |  |
| - NS/NC. | 10 | 31,3% |  |  |
|  |  |  |  |  |
| **10.1.6 Control radiológico de la pieza de tumorectomía** | 32 | 100% |  |  |
| - Siempre | 24 | 75% |  |  |
| - A veces | 8 | 25% |  |  |
| - Nunca |  |  |  |  |
| - NS/NC. |  |  |  |  |
|  |  |  |  |  |
| **10.2 Respecto al GC (SNOLL)** |  |  |  |  |
| **Tasa de detección del GC** | 33 | 100% |  |  |
| - < 85 %. | 2 | 6,1% |  |  |
| - 85 - 90 %. | 1 | 3,0% |  |  |
| - 90 - 95 %. | 4 | 12,1% |  |  |
| - 95 %. | 26 | 78,8% |  |  |
| - NS/NC. |  |  |  |  |
|  |  |  |  |  |
| **11. Recursos en quirófano (multiopción):** |  |  |  |  |
| - Sonda gammadetectora. | 34/34 | 100% |  |  |
| - Gammacámara portátil. | 7/34 | 36,6% |  |  |
| - Médico nuclear en el quirófano. | 30/34 | 88,2% |  |  |
| - Utiliza el MN la sonda. | 23/34 | 67,6% |  |  |
|  |  |  |  |  |
| **12. APARTADO ESPECIFICO DE SEMILLA DE 125I** |  |  |  |  |
| **¿Utiliza semillas de 125I en su servicio?** | 34 | 100% |  |  |
| - Si | 9 | 26,5% |  |  |
| - No | 25 | 73,5% |  |  |
|  |  |  |  |  |
| **12.1 Uso de semillas de 125I** |  |  |  |  |
| **12.1.1 Utiliza semillas desde hace…** | 9 | 100% |  |  |
| - <1 años | 1 | 11,1% |  |  |
| - 1-2 años. | 3 | 33,3% |  |  |
| - 2-5 años | 4 | 44,4% |  |  |
| - 5-10 años |  |  |  |  |
| - >10 años. | 1 | 11,1% |  |  |
| - NS/NC. |  |  |  |  |
| **12.1.2. Su número aproximado de casos al año es…** | 9 | 100% |  |  |
| - <10. |  |  |  |  |
| - 10-50. | 4 | 44,4% |  |  |
| - 50-100. | 2 | 22,2% |  |  |
| - >100. | 3 | 33,3% |  |  |
| - NS/NC. |  |  |  |  |
|  |  |  |  |  |
| **12.2 Implantación de la técnica:** |  |  |  |  |
| **12.2.1. La implantación de dicha técnica, ha tenido que ser aprobada por algún tipo de comisión o evaluación de nuevas tecnologías?:** | 9 | 100% |  |  |
| - Si | 8 | 88,9% |  |  |
| - No | 1 | 11,1% |  |  |
| - NS/NC |  |  |  |  |
| **12.2.2 Para la implantación de la técnica en su servicio:** | 9 | 100% |  |  |
| - Ha realizado algún tipo de validación |  |  |  |  |
| - Ha asistido a algún curso/taller específico | 6 | 66,7% |  |  |
| - Ambas cosas | 2 | 22,2% |  |  |
| - Ninguna de las anteriores | 1 | 11,1% |  |  |
| - NS/NC |  |  |  |  |
| **12.2.3. Las semillas que utiliza…** | 9 | 100% |  |  |
| - Son adquiridas directamente por su servicio para este fin. | 4 | 44,4% |  |  |
| - Se reutilizan aquellas adquiridas inicialmente para braquiterapia y que por su decaimiento no son útiles con fines terapéuticos. | 5 | 55,6% |  |  |
| - Otros (especificar): |  |  |  |  |
| - NS/NC |  |  |  |  |
|  |  |  |  |  |
| **12.3 Indicación del empleo de semillas 125I.** |  |  |  |  |
| **12.3.1 Indicación:** |  |  |  |  |
| - Marcaje de lesiones no palpables de mama con/sin de BSGC | 9 | 100% |  |  |
| - Marcaje de ganglios inicialmente metastáticos en pacientes sometidas a QTN. | 9 | 100% |  |  |
| - Otras (indique de forma clara y escueta otras situaciones en las que utilice semillas) | 6 | 66,7% |  |  |
|  |  |  |  |  |
| **12.3.2 En caso de marcar ganglios axilares qué técnica utiliza (multiopción)** |  |  |  |  |
| - Marcaje de ganglio positivos antes de QTN (MARI) | 2 | 22,2% |  |  |
| - Marcaje tras QTN sobre ganglios inicialmente positivos con clip metálicos colocados antes de QTN y BSGC tras ésta (TAD) | 9 | 100% |  |  |
| - Marcaje de ganglios positivos antes de QTN y BSGC tras ésta (RISAS) | 3 | 33,3% |  |  |
| - Otras | 0 | 0% |  |  |
|  |  |  |  |  |
| **12.4 preparación y colocación.** |  |  |  |  |
| **12.4.1. Normalmente la semilla la prepara en el dispositivo para su colocación** | 9 | 100% |  |  |
| - El médico nuclear | 4 | 44,4% |  |  |
| - Físico | 1 | 11,1% |  |  |
| - Técnico de MN | 2 | 22,2% |  |  |
| - Técnico de radiofísica | 2 | 22.2% |  |  |
| - Otro |  |  |  |  |
| **12.4.2. Método de colocación de la semilla:** | 9 | 100% |  |  |
| - Únicamente ecografía | 3 | 33,3% |  |  |
| - Únicamente estereotaxia |  |  |  |  |
| - Ecografía vs. Estereotaxia según caso | 6 | 66,7% |  |  |
| - Otros (comentar). |  |  |  |  |
|  |  |  |  |  |
| **12.5 La actividad media que utiliza en la semilla es:** |  |  |  |  |
| - Tumor: …MBq | 7 |  | Media= 5,0 (0,2-7,0) Moda=7 |  |
| - Axila tras QTN: …MBq | 7 |  | Media= 5,7 (0,2-9,25)  Moda=7 |  |
| - Axila pre QTN: ….MBq | 3 |  | Media= 7,8 (4,48-12) Moda=N/A |  |
| - Otras situaciones (indicar cual): …MBq | 6 |  | Media=5,1 (0,20-7) Moda=7 |  |
|  |  |  |  |  |
| **12.6 Con cuantos días antes de su extirpación suele colocar la semilla (media):** |  |  |  |  |
| - Tumor: …dias | 7 |  | Media=2,9 (1-7) Moda=1 |  |
| - Axila tras QTN: ...días | 7 |  | Media=2,5 (1-7) Moda=1 |  |
| - Axila preQTN: …días | 2 |  | Media=83,5 (7-160) Moda=N/A |  |
| - Otras situaciones (indicar cual): ....días | 5 |  | Media=3,2 (1-7) Moda=1 |  |
|  |  |  |  |  |
| **12.7 Control radiológico de la pieza:** | 9 | 100% |  |  |
| - Siempre | 7 | 77,8% |  |  |
| - A veces | 2 | 22,2% |  |  |
| - Nunca |  |  |  |  |
| - NS/NC. |  |  |  |  |
|  |  |  |  |  |
| **13. COMENTARIO: escriba cualquier comentario que considere digno de mención que no se haya contemplado en la encuesta.** |  |  |  | Ver en texto |
